# Supplementary material for: From genomic to panomic predictions: An intuitive PANOMICs platform utilizing advanced Machine Learning algorithms
Source: Research Square preprint supplement (doi:10.21203/rs.3.rs-5064454/v1), 2024-10-21
Supplement: Supplementary file 1 [file 1aa367b347d6f91d2bbfc756.xlsx]

## Sheet: Tabelle1
	PC1	PC2
Trehalose	0.254804	-0.0467482
Raffinose	0.236131	-0.124968
Galactinol	0.234232	-0.068611
Sucrose	0.219472	-0.0707569
Lactic.acid	0.197569	0.0865218
Aspartic.acid	0.154729	0.219578
Putrescine	0.153828	0.285339
Threonic.acid	0.147384	-0.0302847
Glucose	0.147348	-0.2839
Fructose	0.141785	-0.272806
Fumaric.acid	0.135128	-0.168049
Citric.acid	0.123352	0.054107
Threitol	0.117203	-0.0194886
Proline	0.0964171	0.101331
Glutamine	0.0935697	0.349933
myo.Inositol	0.0634339	-0.0650952
Butanoic.acid	0.0619223	-0.141124
Spermidine	0.0548846	0.183209
Asparagine	0.0260432	0.350374
Malic.acid	0.00682382	-0.00575028
Glutamic.acid	-0.0237941	0.270773
Glycine	-0.0607786	-0.0760793
Maltose	-0.0634459	-0.237865
Galactose	-0.0636993	-0.282727
Ornithine	-0.0935742	0.185499
Pyruvic.acid	-0.134824	-0.0957168
Valine	-0.154023	-0.0263346
Alanine	-0.158886	-0.024786
Serine	-0.165381	0.175101
Oxoglutaric.acid	-0.182326	-0.0763882
Tyrosine	-0.183971	0.0294984
Threonine	-0.20871	0.0742811
Succinic.acid	-0.236037	-0.142838
Lysine	-0.239238	0.0650849
Phenylalanine	-0.247459	0.0371384
Isoleucine	-0.27081	-0.0689343
Leucine	-0.274749	-0.0221317
Showing 1 to 10 of 37 entries, 37 total columns
